# Supplementary material
Source: Frontiers journal article supplement (https://www.frontiersin.org/articles/489337)
Supplement: Data_Sheet_5.PDF [file Data_Sheet_5.PDF]

## ANALYSES OF GENDER EFFECTS

Gender effects have been suggested in reading, with boys relying more on visual processes (Hystegge et al., 2012). To assess whether gender might have an impact of our results, we first tested if the proportion of boys/girls differed as a function of reading level, but this was not the case ( $Chi^2(1,37)=1.303$ ;  $p=0.254$ ;  $\phi = 0.18$ ). Second, we ran independent t-tests on behavioral measures for the whole sample, comparing boys and girls. None of these comparisons was significant, except for speed in visual attention where boys were slower than girls (see Table here below).

| Behavioral tests and sub-tests             | Scores: mean (SD) |                  |                  | Independent t-tests |         |
|--------------------------------------------|-------------------|------------------|------------------|---------------------|---------|
|                                            | Total             | Boys             | Girls            | t-value             | p-value |
| General cognitive functions                | N = 42            | N = 20           | N = 22           |                     |         |
| Nonverbal intelligence (CPM, % accuracy)   | 76.26<br>(12.20)  | 76.39<br>(11.76) | 76.14<br>(12.84) | 0.066               | 0.948   |
| Selective attention (TEA-Ch, speed in sec) | 6.75<br>(2.36)    | 7.59<br>(2.23)   | 5.99<br>(2.25)   | 2.315               | 0.026   |
| Vocabulary production (N-EEL, % accuracy)  | 77.63<br>(9.57)   | 76.22<br>(10.84) | 78.90<br>(8.29)  | -0.904              | 0.371   |
| Reading ability                            |                   |                  |                  |                     |         |
| Single letters (BELO, % accuracy)          | 71.43<br>(20.48)  | 70.57<br>(22.47) | 72.20<br>(18.98) | -0.254              | 0.801   |
| Composite score (BELO, BALE, % accuracy)   | 34.57<br>(18.75)  | 35.34<br>(20.18) | 33.86<br>(17.79) | 0.254               | 0.801   |

Finally, we ran an ANOVA with Hemisphere (LH, RH) x Conditions (PF-PW, PF-W, PF-GW) with a split sample as a function of gender (see histogram below). The results were similar for boys and girls, except that boys were less left-lateralized than girls *in all conditions*, given that this factor did not reach significance in boys ( $F(1,19)=2.513$ ;  $p=0.12$ ), while it did in girls ( $F(1,21)=8.584$ ;  $p=0.008$ ). Conditions did not differ in any group, boys: ( $F(2,38)=1.989$ ;  $p=0.151$ ), girls ( $F<1$ ), and the interaction did not reach significance either, boys, ( $F(2,38)=1.063$ ;  $p=0.356$ ), girls ( $F(2,42)=2.151$ ;  $p=0.129$ ).

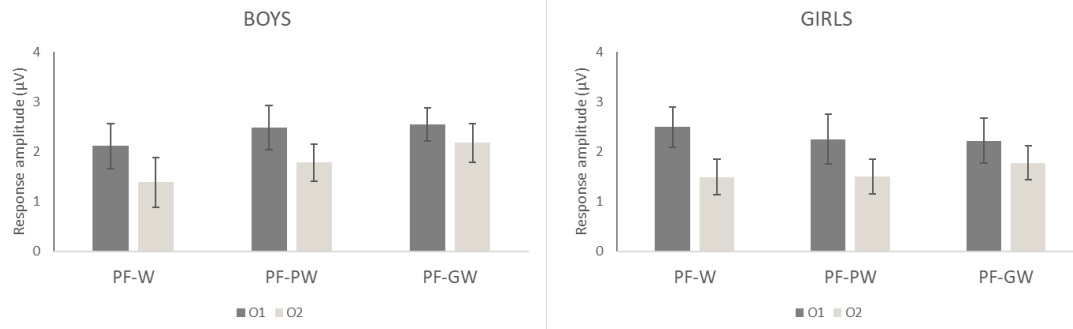

Thus, although visual processes may vary with gender and this may influence reading processes and strategies, in the current sample we do not find any bias in gender distribution for good/poor readers, no differences between boys and girls in behavioral scores of reading, vocabulary, or Raven progressive matrices -which is a visual/perceptual reasoning test. Finally, no difference in the pattern of neural responses across conditions emerged when splitting the file by gender, on the contrary to what happens when we analyzed the impact of reading level.
